# Supplementary material for: Periodontitis induced by Porphyromonas gingivalis drives periodontal microbiota dysbiosis and insulin resistance via an impaired adaptive immune response
Source: HighWire-hosted journal article supplement (doi:10.1136/gutjnl-2015-309897), 2016-02-02
Supplement: gutjnl-2015-309897supp.pdf [file gutjnl-2015-309897supp.pdf]

**Supplementary Figure 1. *Pg*, *Fn* and *Pi* oral colonization induces periodontitis linked to specific periodontal pathogens.** Periodontal microbiota was explored by Pyrosequencing analysis. A) Linear Discriminant Analysis (LDA) score for discriminating bacteria in each group: NC (normal chow, blue bar, n = 6), NC-Co (normal chow colonized, purple bar, n=6), HFD (high-fat diet, red bar, n=7) and HFD-Co (High-fat diet colonized, green bar, n=10); abundance (% of the total identified sequences per group) at the level of Phylum (B), Class (C), Order (D), Family (E), Genus (F) and Species (G) in each group.

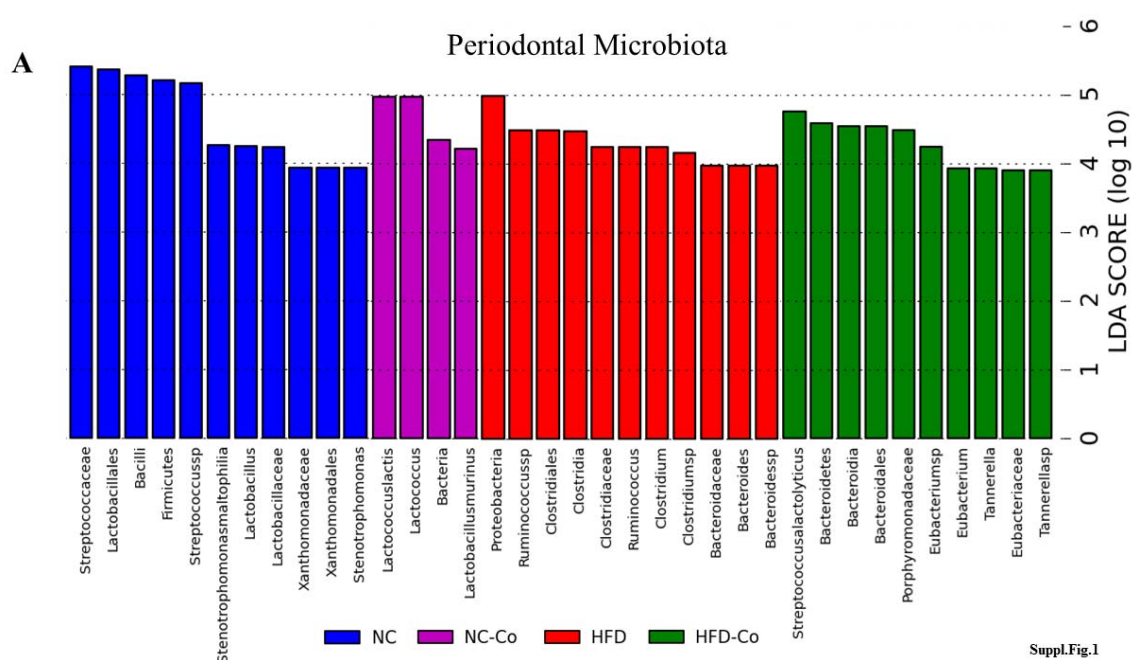

Suppl.Fig.1

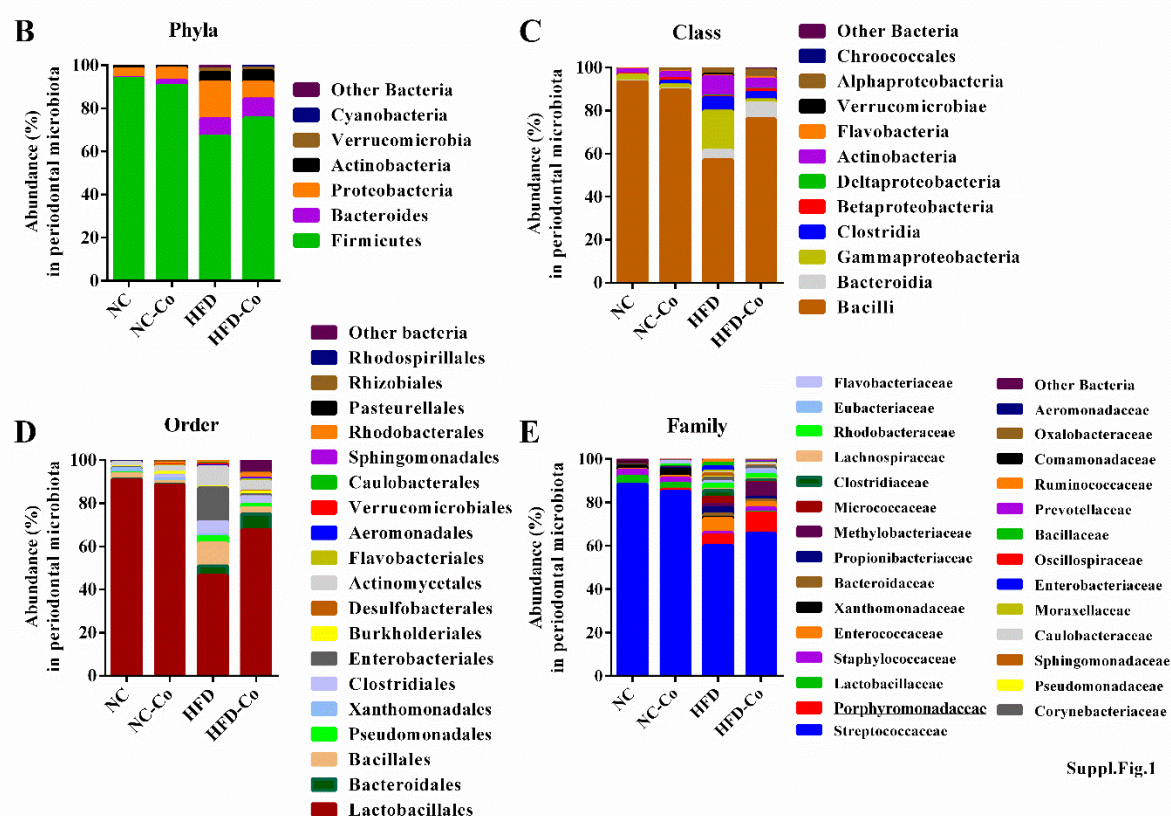

Suppl.Fig.1

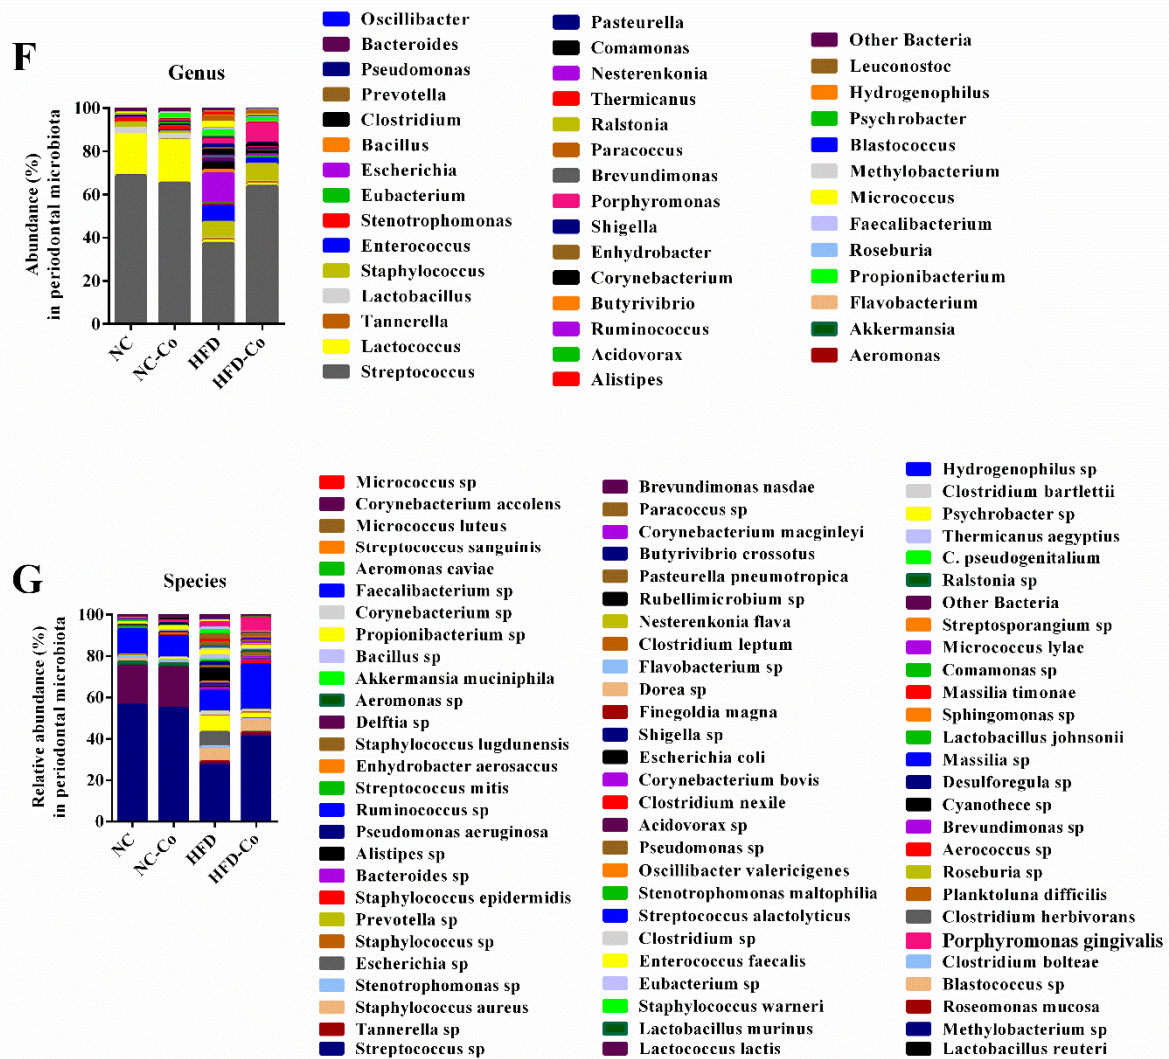

Suppl.Fig.1

**Supplementary Figure 2. Oral colonization with *Pg*, *Fn* and *Pi* did not affect gut microbiota in HFD- and NC Diet-fed mice.** A-B) Cladograms on gut microbiota explored by MiSeq analysis for NC (normal chow, red bar, n = 4), NC-Co (normal chow colonized, green bar, n=3), HFD (high-fat diet, red bar, n=6) and HFD-Co (High-fat diet colonized, green bar, n=7). Abundance (% of the total identified sequences per group) at the level of Phylum (C), Class (D), Order (E), Family (F), Genus (G) and Species (H) in each group.

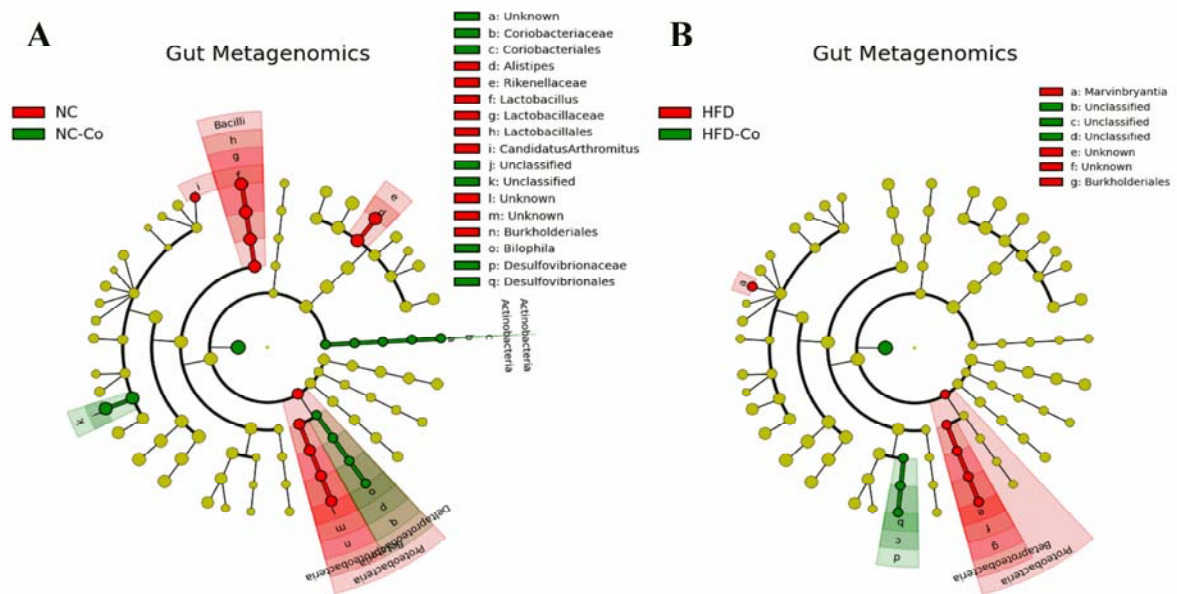

Suppl. Fig. 2



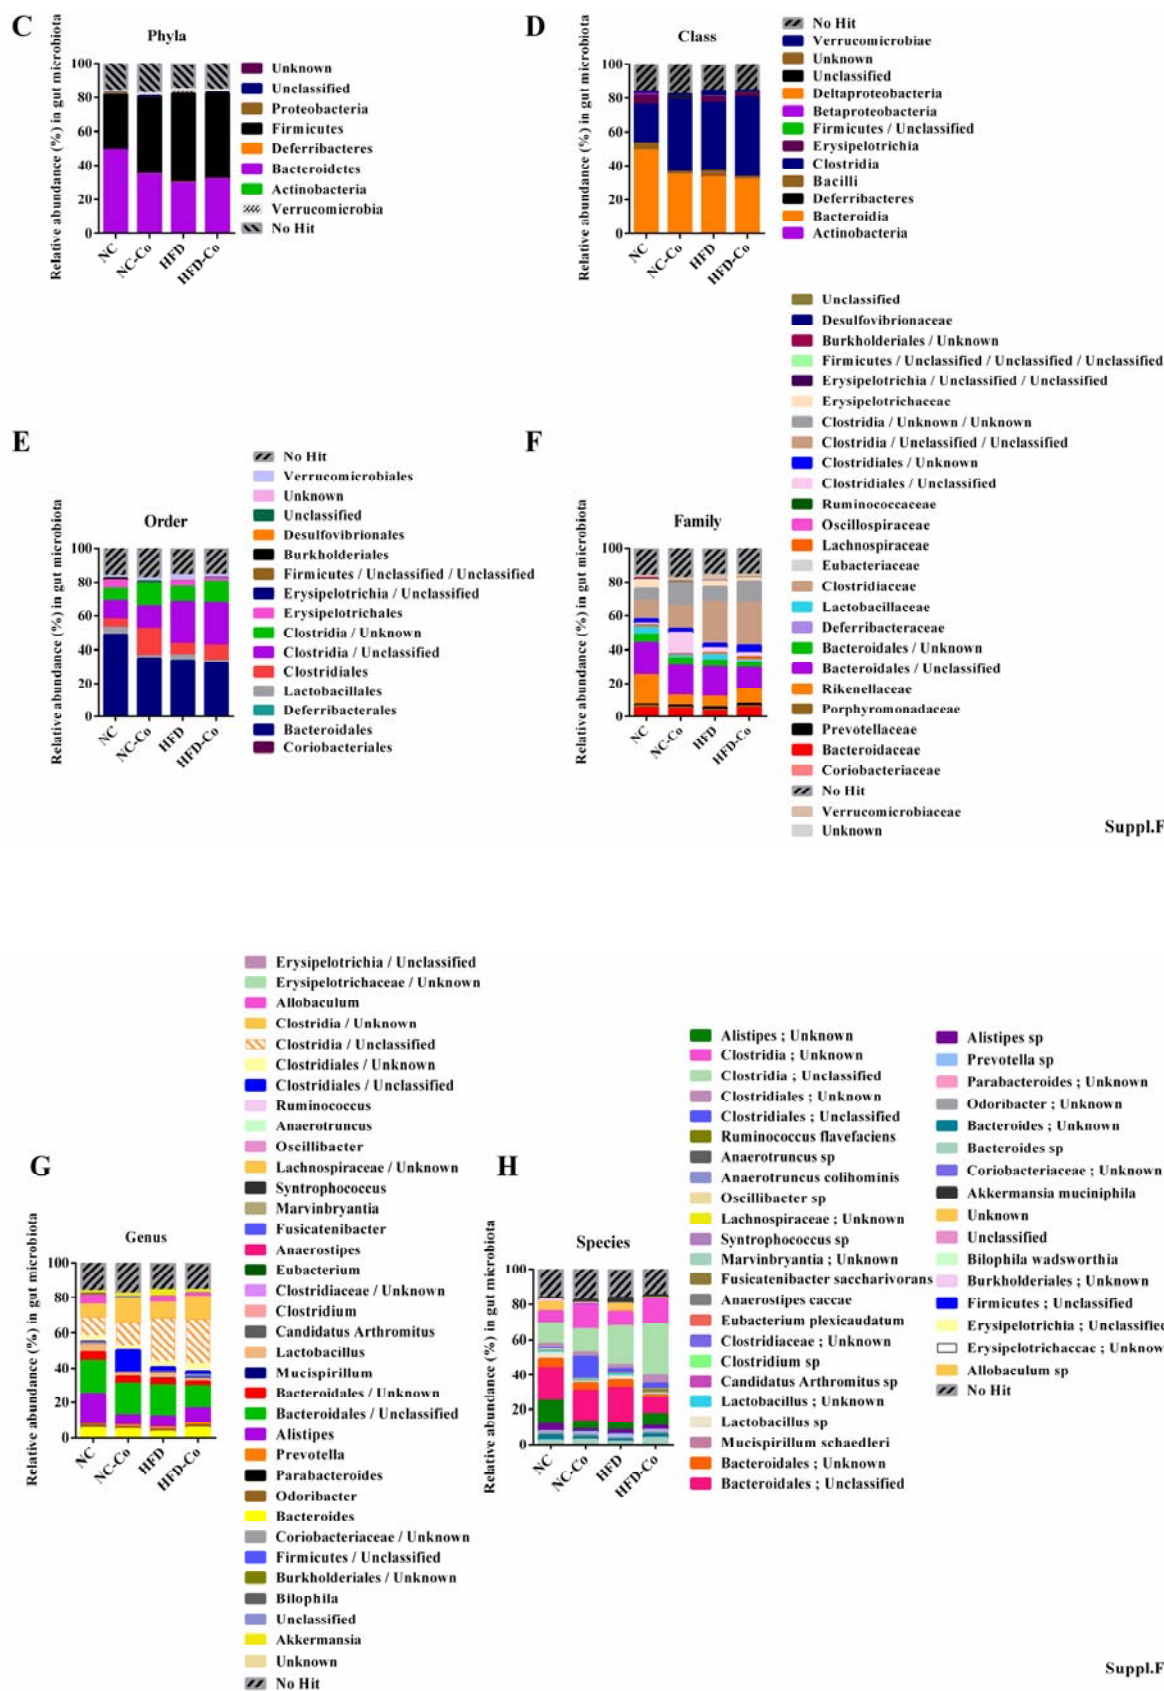

Suppl.Fig.2

Suppl.Fig.2

**Supplementary Figure 3. Pre-treatment with inactivated *Porphyromonas gingivalis* induced production of antibodies against *Porphyromonas gingivalis*** A) Mice were injected by  $10^6$  CFU of inactivated *Porphyromonas gingivalis* or inactivated *Fusobacterium nucleatum* or inactivated *Prevotella intermedia* or a mix of all inactivated bacteria or vehicle solution. 1 month later, mice were colonized by *Pg*, *Fn*, *Pi* and or by vehicle solution for one month and then randomized in 7 groups: Sham (vehicle + normal chow, black bar, n = 4), HFD (vehicle + HFD, red bar, n=4), HFD-Co (vehicle + HFD + colonization, green bar, n=4), HFD-Co + I B mix (inactivated mix bacteria + colonization + HFD, black blue bar, n=4), HFD-Co + I *Pg* (inactivated *Porphyromonas gingivalis* + colonization + HFD, purple bar, n= 4), HFD-Co + I *Fn* (inactivated *Fusobacterium nucleatum* + colonization + HFD, light blue bar, n= 4) and HFD-Co + inactivated *Pi* (inactivated *Prevotella intermedia* + colonization + HFD, orange bar, n= 4). Intraperitoneal Glucose-Tolerance Test (IpGTT) and glycaemic index were assessed for each group after 1 month of HFD (B-F); G) Measurement of Immunoglobulin G antibodies specific to LPS of *Porphyromonas gingivalis* in blood. Data are mean  $\pm$  SEM. Significant results when: \*\*P<0.01, \*\*\*P<0.001 and \*\*\*\*P<0.0001 when compared to HFD-vehicles, §P<0.05 and §§§§P<0.0001 when compared to NC-vehicles and #P<0.05 and #####P<0.0001 when compared to HFD-Co as determined by Two-Way ANOVA with Bonferroni's post-test for B, C,D and E and one-way ANOVA followed by Tukey's post-test for F and G.

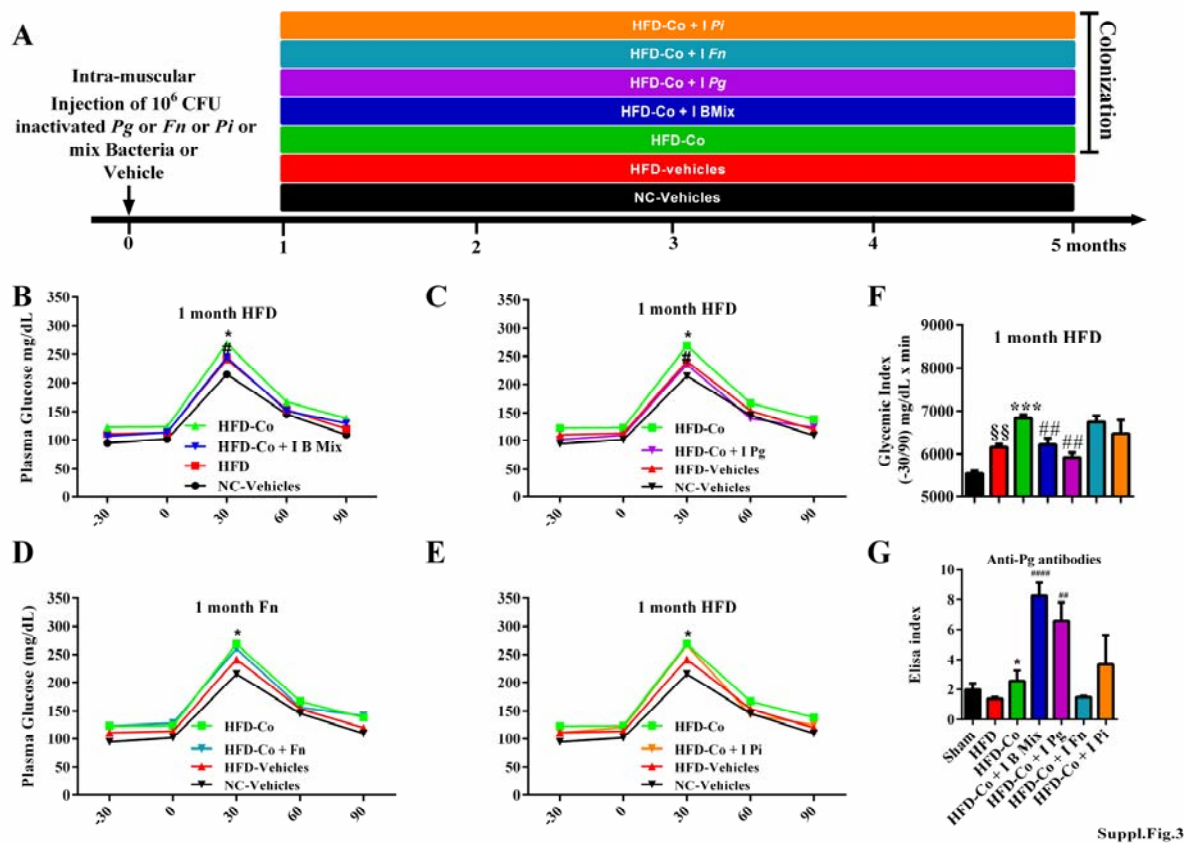

Suppl.Fig.3
